# Supplementary material for: Antennal RNA-sequencing analysis reveals evolutionary aspects of chemosensory proteins in the carpenter ant, Camponotus japonicus
Source: PubMed Central journal article supplement (PMC4550911; doi:10.1038/srep13541), 2015-08-27
Supplement: srep13541-s1.pdf [file srep13541-s1.pdf]

## Supporting Information

Antennal RNA-sequencing analysis reveals evolutionary aspects of chemosensory proteins in the carpenter ant *Camponotus japonicus*

Masaru K. Hojo<sup>1\*</sup>, Kenichi Ishii<sup>2\*</sup>, Midori Sakura<sup>1</sup>, Katsushi Yamaguchi<sup>3</sup>, Shuji Shigenobu<sup>3,4</sup>, Mamiko Ozaki<sup>1</sup>

<sup>1</sup>Department of Biology, Graduate School of Science, Kobe University, Kobe, Japan

<sup>2</sup>Department of Biological Sciences, Graduate School of Science, The University of Tokyo, Tokyo, Japan

<sup>3</sup>NIBB Core Research Facilities, National Institute for Basic Biology, National Institutes of Natural Sciences, Okazaki, Japan

<sup>4</sup>Department of Basic Biology, School of Life Science, Graduate University for Advanced Studies, Okazaki, Japan

\*Equal contribution

## Supplemental Tables

### Supplemental Table S1. Nucleotide sequences of primers used for cloning of

*CjapCSPs*.

Lower-case letters indicate additional sequences for restriction enzyme recognition.

| Gene             | Forward primer (5'-3')                | Reverse primer (5'-3')                         |
|------------------|---------------------------------------|------------------------------------------------|
| <i>CjapCSP1</i>  | aaggatccGAGGAAATGTACTCGG<br>ACATG     | aactcgagTCAACGGGTAAAGGGGATG                    |
| <i>CjapCSP2</i>  | aaggatccGCCGAATCGGACAATA<br>GCG       | aactcgagTTATGAAACTCCAGCGTATT<br>GTTG           |
| <i>CjapCSP3</i>  | aaggatccCGGCCACAAGACCATT<br>ATAC      | aactcgagTTAATTTTCTTTCTTCAAGG<br>CTCGATC        |
| <i>CjapCSP4</i>  | aaggatccGAGGACGTGCAGTATA<br>CTAC      | aactcgagTCAATCCAATCTGCCTCCTT<br>C              |
| <i>CjapCSP7</i>  | aaggatccGACGATAAGTACACGA<br>CCAAG     | aactcgagTCACGCTTTTATGTTGCGTT<br>TCTC           |
| <i>CjapCSP12</i> | aaggatccGAGGAAGAGAAATACG<br>AGGATAA   | aactcgagTTATTCTTTAGCTTTTTTCTT<br>CATATCTTCTAAA |
| <i>CjapCSP13</i> | aaggatccGAAGAACTTTATAGCG<br>ATCAGTACG | aactcgagTTATTGACCAGCATTCTTCT<br>TTTTCATATCTTC  |

**Supplemental Table S2.** Nucleotide sequences of primers used for RT-PCR.

| Gene                                                             | Forward primer (5'-3')      | Reverse primer (5'-3')       |
|------------------------------------------------------------------|-----------------------------|------------------------------|
| Elongation factor 1<br>( <i>ef1</i> )                            | CCCTTCGTCTTCCCCTTCA         | ACCATACCGGGTTTCAGCA<br>C     |
| 60S ribosomal protein<br>L32 ( <i>rpl32</i> )                    | CCAACAGGCTTCCGTAAAG<br>TTC  | TCTCTGCACAAAACCTTGCGA<br>TT  |
| 60S ribosomal protein<br>L18 ( <i>rpl18</i> )                    | AAGAAACCTGGACGGGAG<br>AA    | CGAGCTCTTTCGGTTACACG         |
| Glyceraldehyde-3-phos<br>phate dehydrogenase<br>( <i>gapdh</i> ) | CATGACGACTGTACATGCG<br>ATT  | GCAGCGGGAATAATGTTTT<br>G     |
| <i>CjapCSP2</i>                                                  | ATTCGCGACGAAATGTCGA<br>A    | CTGGGGACGATTCTCGGTGT         |
| <i>CjapCSP2</i>                                                  | GCGACAAGCGTTACTTGAC<br>C    | CAGGAGCCTCTCAAAACCA<br>A     |
| <i>CjapCSP3</i>                                                  | CAAATGCCCTCTGAAGCT<br>C     | CGCCTTTCTCGCAATTTCTT         |
| <i>CjapCSP4</i>                                                  | AGATGCGGCGGAACTCAA          | CGCTGTTGCAATTTAAACG<br>A     |
| <i>CjapCSP5</i>                                                  | CAGGGGATTGCGATGGATT<br>T    | CGGGGTACAACGACGACAT<br>TT    |
| <i>CjapCSP6</i>                                                  | GGTGTGTTGTTGGACGAAGG<br>A   | TTCTGCCGTAGCCTTTTGT<br>T     |
| <i>CjapCSP7</i>                                                  | TGCCTGCTGGATAAGGGAA<br>A    | GCATTTGCTGCACTCGGTCT         |
| <i>CjapCSP8</i>                                                  | CCGATGCACGCAGTCTTAA<br>A    | TGCCTATTTTTCTTGCTCCT<br>G    |
| <i>CjapCSP9</i>                                                  | TACGGGATCTGCACGCTTC<br>T    | TCGGTAATCGCATTGAGAA<br>TGT   |
| <i>CjapCSP10</i>                                                 | GTGCAAGACAGCTGATCAA<br>AGA  | ACCAATCGAGTACGATTTCC<br>AA   |
| <i>CjapCSP12</i>                                                 | GTTTCATGGCAACAGGACC<br>A    | TGCACTTAGTTTGAAAAGCC<br>TCAC |
| <i>CjapCSP13</i>                                                 | CCATGTCTAACAGCAGAAG<br>CAAA | TCAACGATCTTCTGCCATTT<br>GT   |

**Supplemental Table S3.** Nucleotide sequences of primers used for *in situ* hybridization

Lower-case letters indicate additional sequences for restriction enzyme recognition.

Note that the same primers listed in gene cloning (Supplemental Table S1) were used for *CjapCSP12* and *CjapCSP13*.

| Gene             | Forward primer (5'-3')                | Reverse primer (5'-3')                         |
|------------------|---------------------------------------|------------------------------------------------|
| <i>CjapCSP1</i>  | GGACATGTTTCGATCACATCAA                | CCTCGAAAACACTACACATGATGC                       |
| <i>CjapCSP12</i> | aaggatccGAGGAAGAGAAATAC<br>GAGGATAA   | aactcgagTTATTCTTTAGCTTTTTTC<br>TTCATATCTTCTAAA |
| <i>CjapCSP13</i> | aaggatccGAAGAACTTTATAGC<br>GATCAGTACG | aactcgagTTATTGACCAGCATTCTT<br>CTTTTTCATATCTTC  |

## **Supplemental Dataset**

**Supplemental dataset S1.** Nucleotide sequences of twelve annotated CjapCSPs

**Supplemental dataset S2.** Amino acid sequences of twelve annotated CjapCSPs
